# Supplementary material for: The Simultaneous Determination of Chlorpyrifos–Ethyl and –Methyl with a New Format of Fluorescence-Based Immunochromatographic Assay
Source: MDPI journal article supplement (doi:10.3390/bios12111006), 2022-11-11
Supplement: s1 [file s1]

---

## Supplemental Information

# Simultaneous determination of chlorpyrifos-ethyl and -methyl by new format of fluorescence-based immunochromatographic assay based on a monoclonal antibody

Zi-Hong Xu, Jia Liu, Bin Li, Jun-Kai Wang, Xi Zeng, Zi-Jian Chen, Surat Hongsibsong, Wei Huang, Hong-Tao Lei, Yuan-Ming Sun and Zhen-Lin Xu \*

\* Correspondence: jallent@163.com

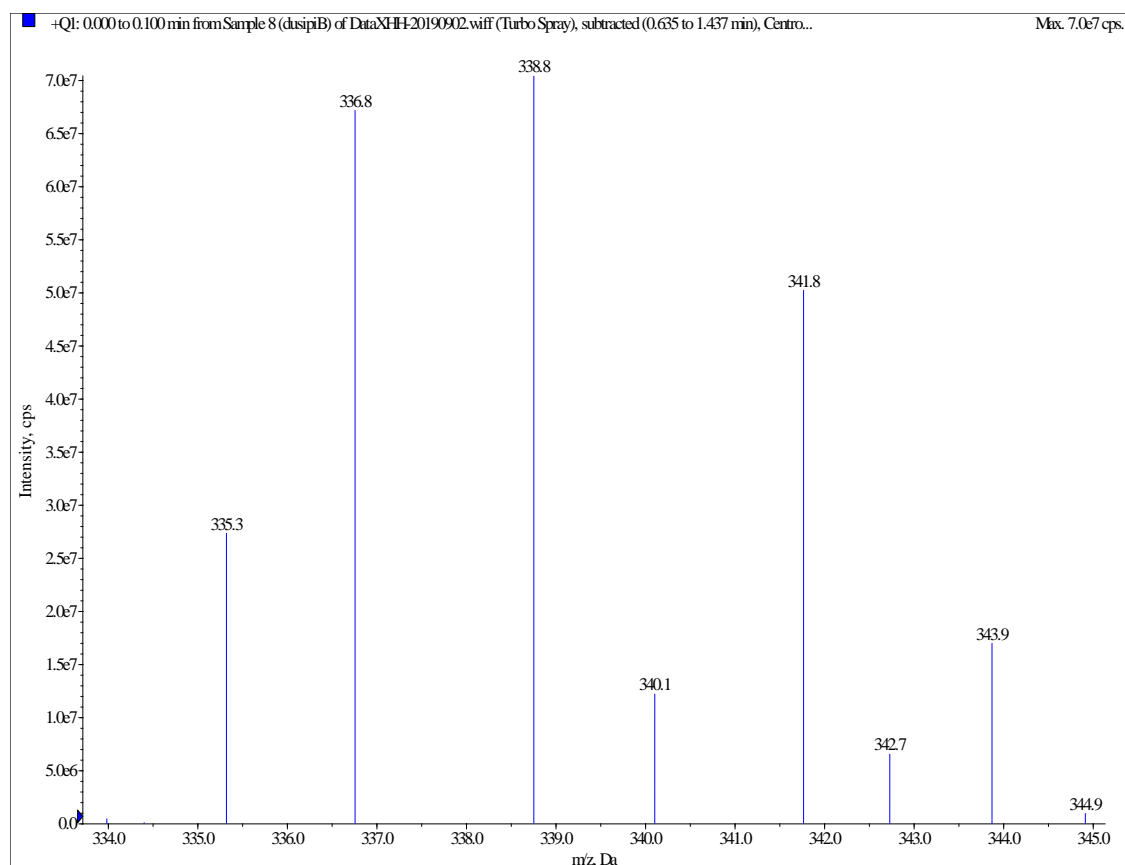

**Figure S1.** ESI-MS spectrum (positive) of CPS-H<sub>1</sub>.

---

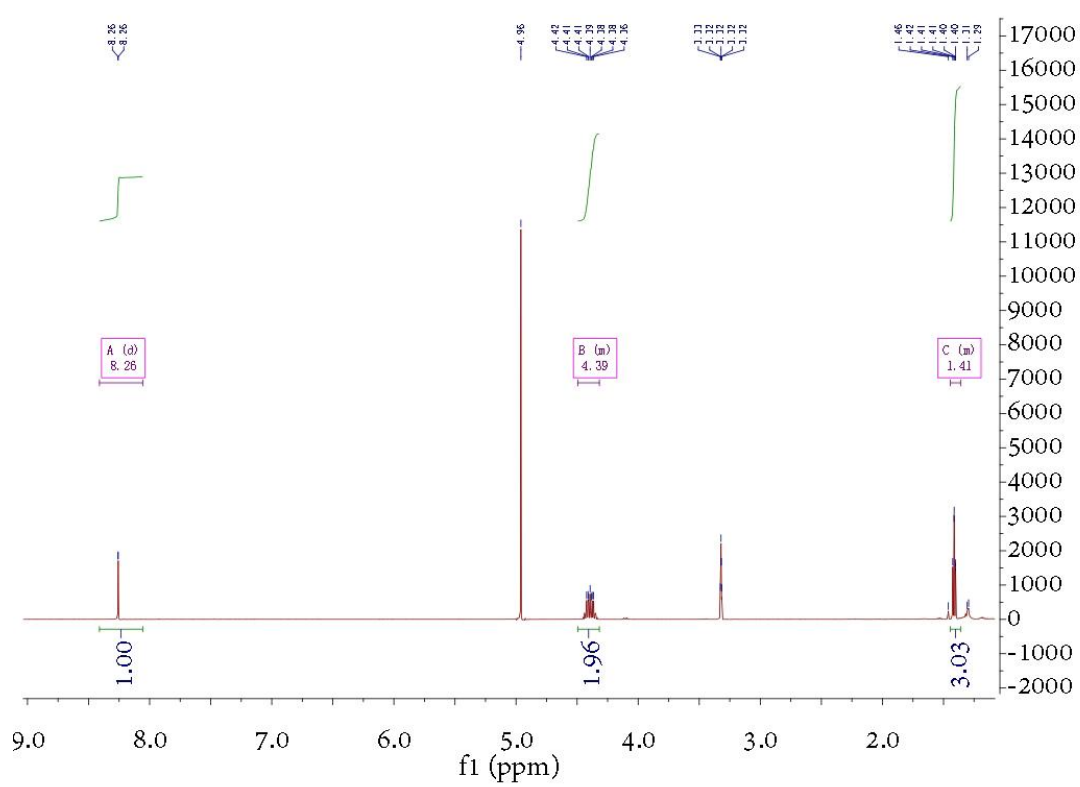

**Figure S2.**  $^1\text{H}$  NMR spectrum of CPS-H<sub>1</sub>.

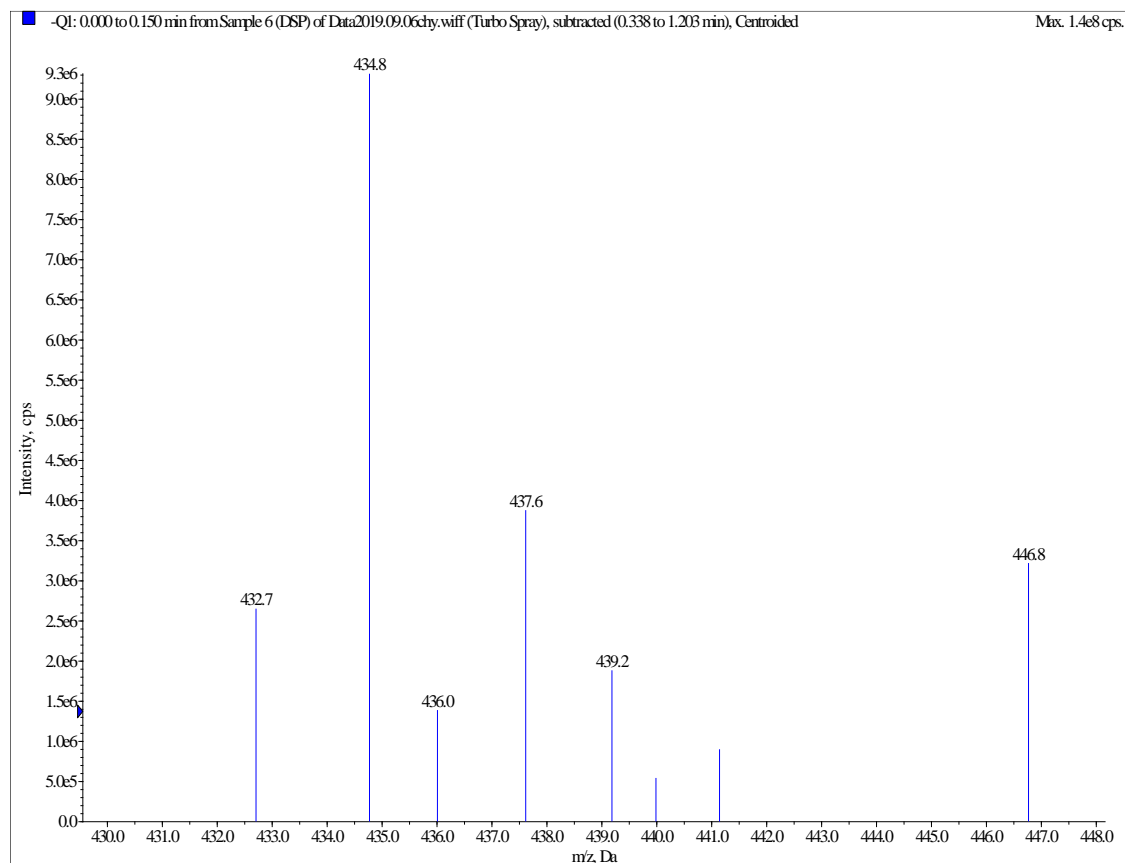

**Figure S3.** ESI-MS spectrum (negative) of CPS-H<sub>2</sub>.

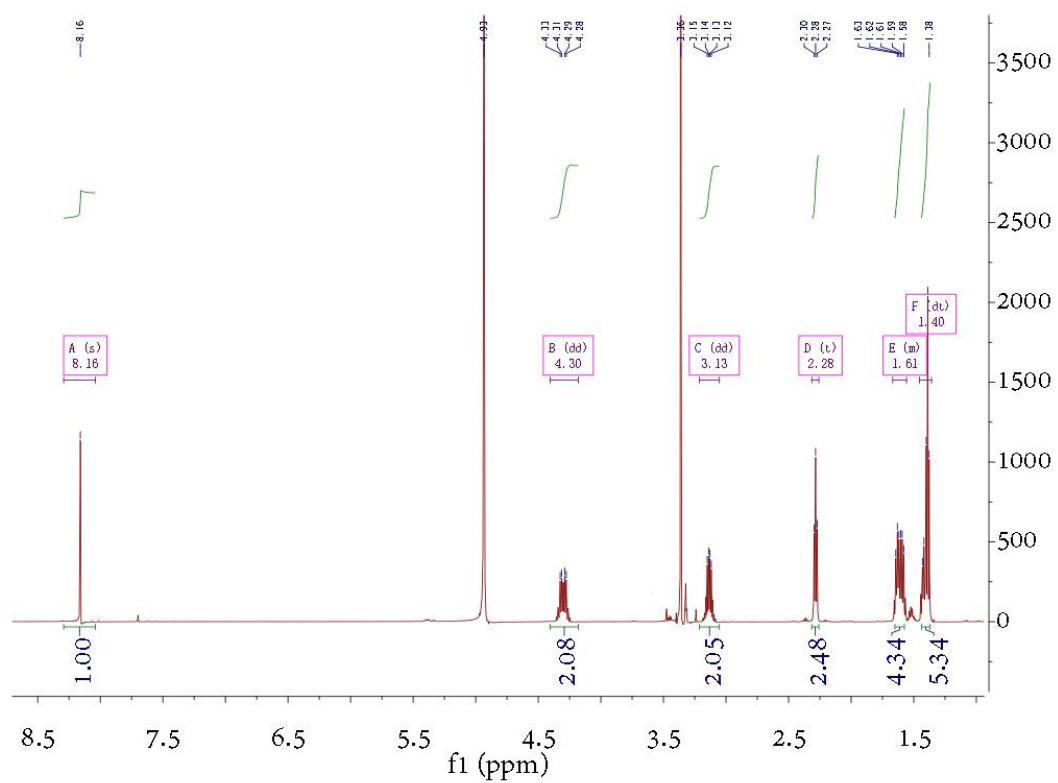

**Figure S4.**  $^1\text{H}$  NMR spectrum of CPS- $\text{H}_2$ .

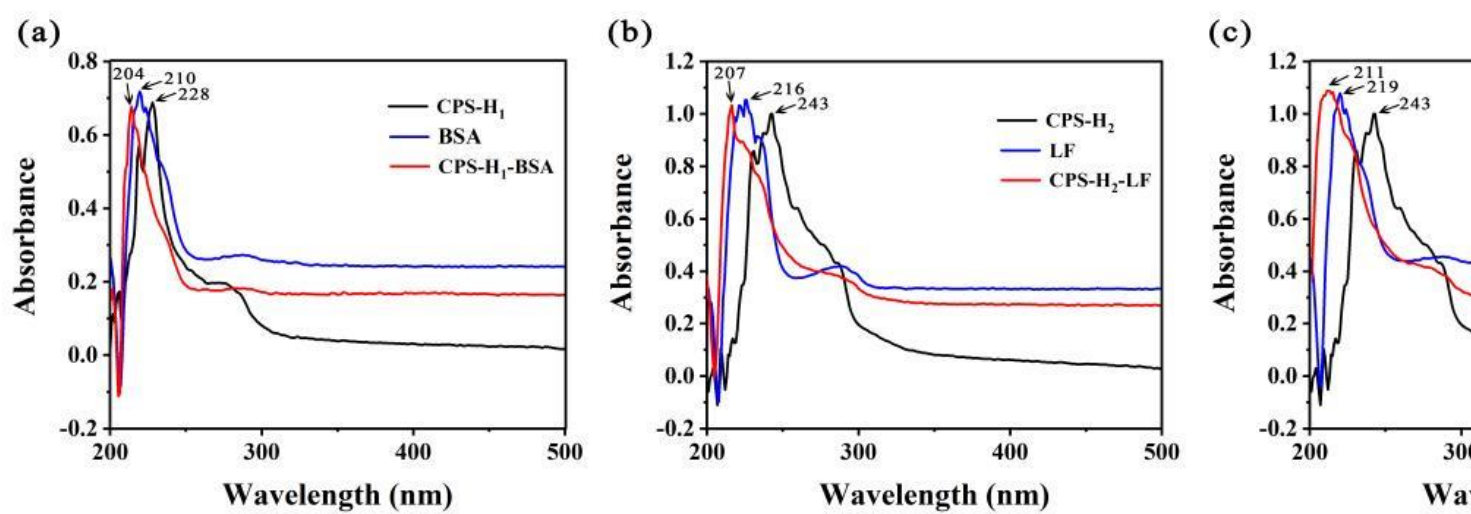

**Figure S5.** The UV wavelength scanning spectra of artificial antigens. **(a)** CPS-H<sub>1</sub>-BSA. **(b)** CPS-H<sub>2</sub>-LF. **(c)** CPS-H<sub>2</sub>-BSA

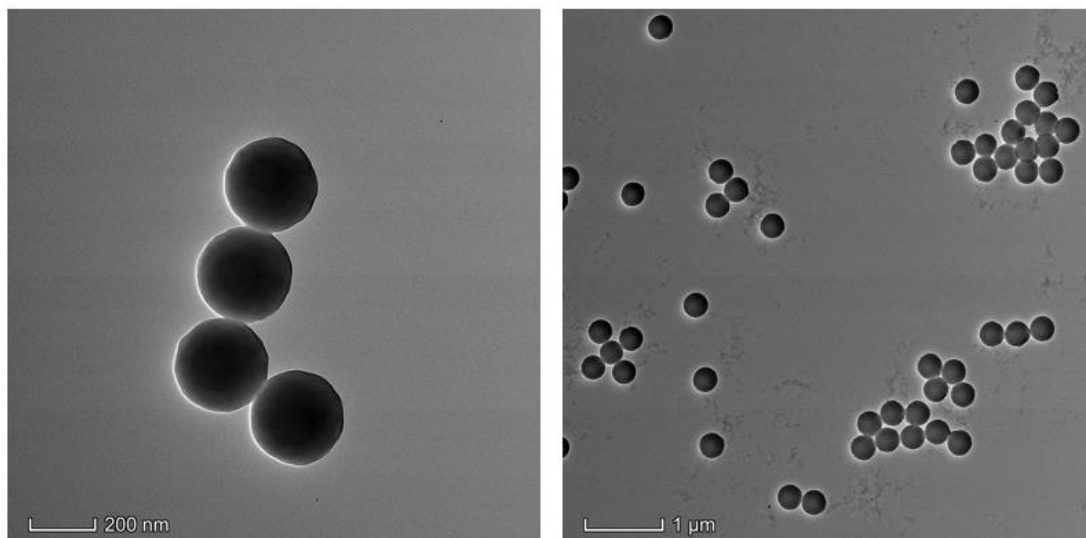

**Figure S6.** The

electron microscope scan of fluorescence microspheres

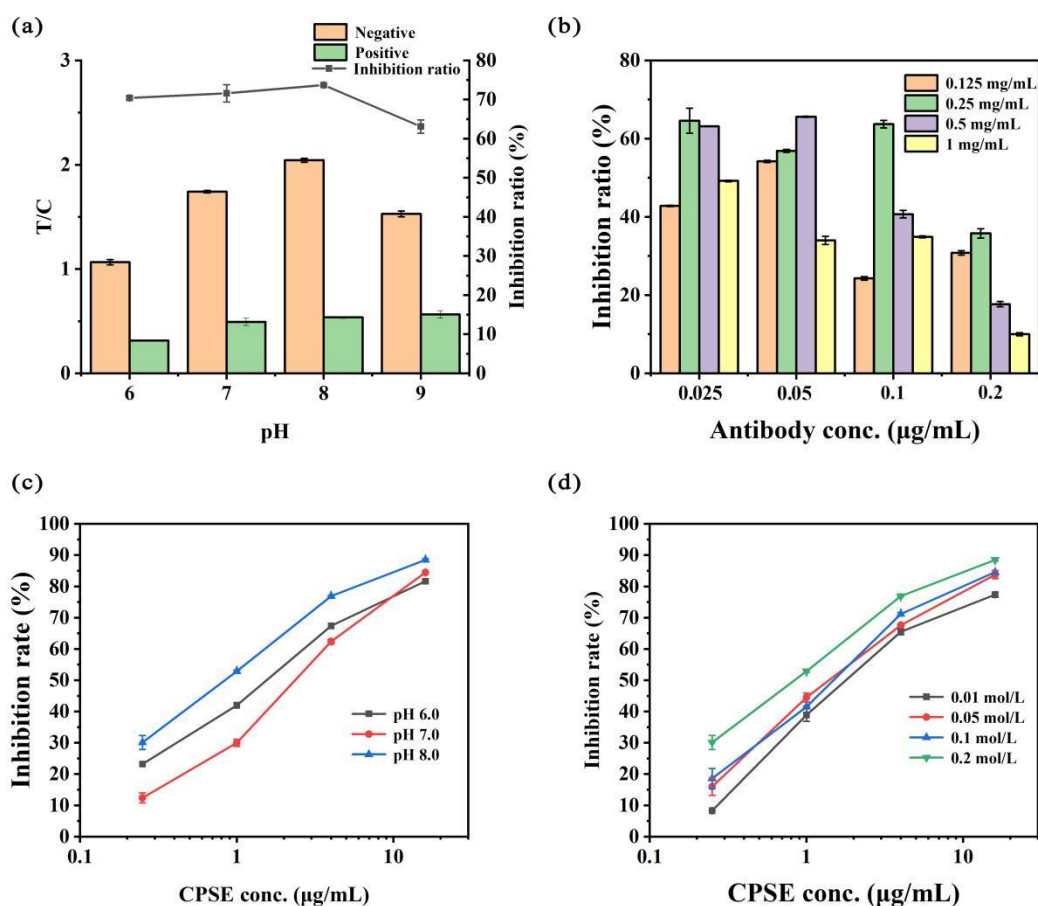

**Figure S7.** The signal intensity and inhibition results of (a) The labeling pH value; (b) The concentrations of antigen and antibody; (c-d) The pH and ion concentration of the CPSE standard buffer. The spiked target concentrations of the inhibitory effect in Fig. S7 (a-d) were 1  $\mu\text{g/mL}$ .

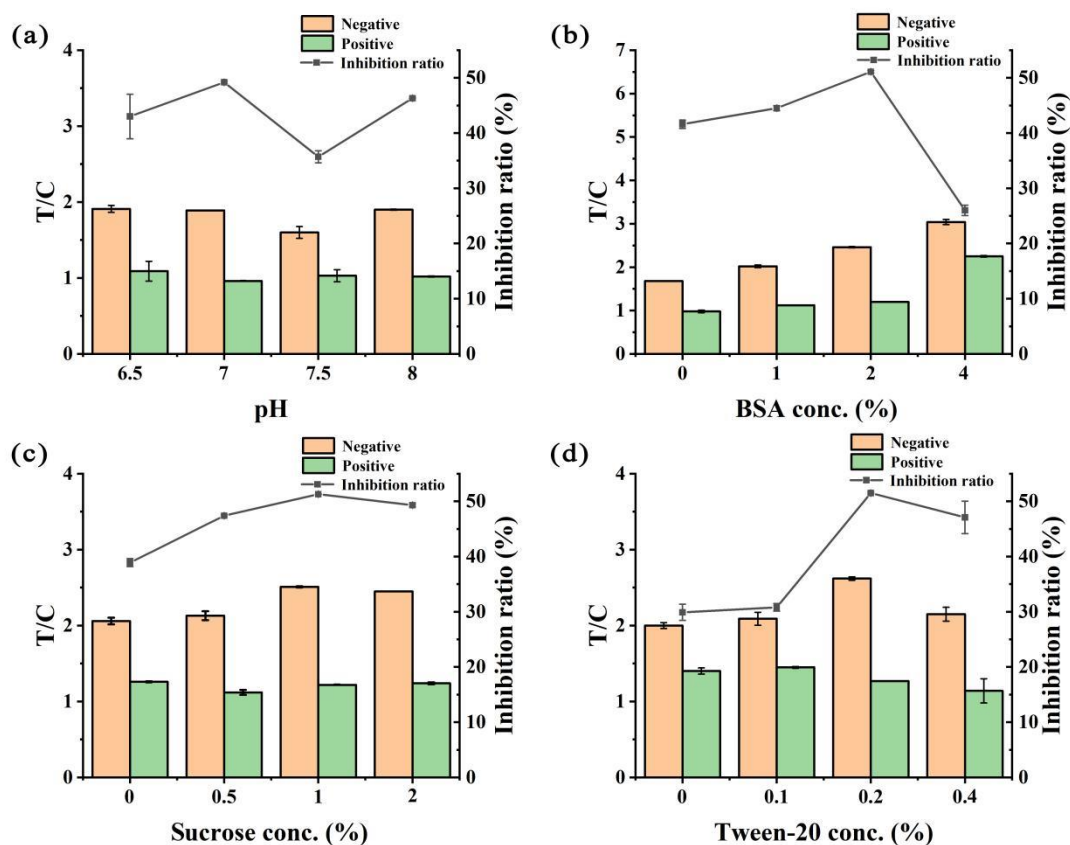

**Figure S8.** The signal intensity and inhibition results of fluorescence probe dilution (a) pH; (b) BSA concentration; (c) Sucrose concentration; (d) Tween-20 concentration. The spiked target concentrations of the inhibitory effect were 1  $\mu\text{g/mL}$ .



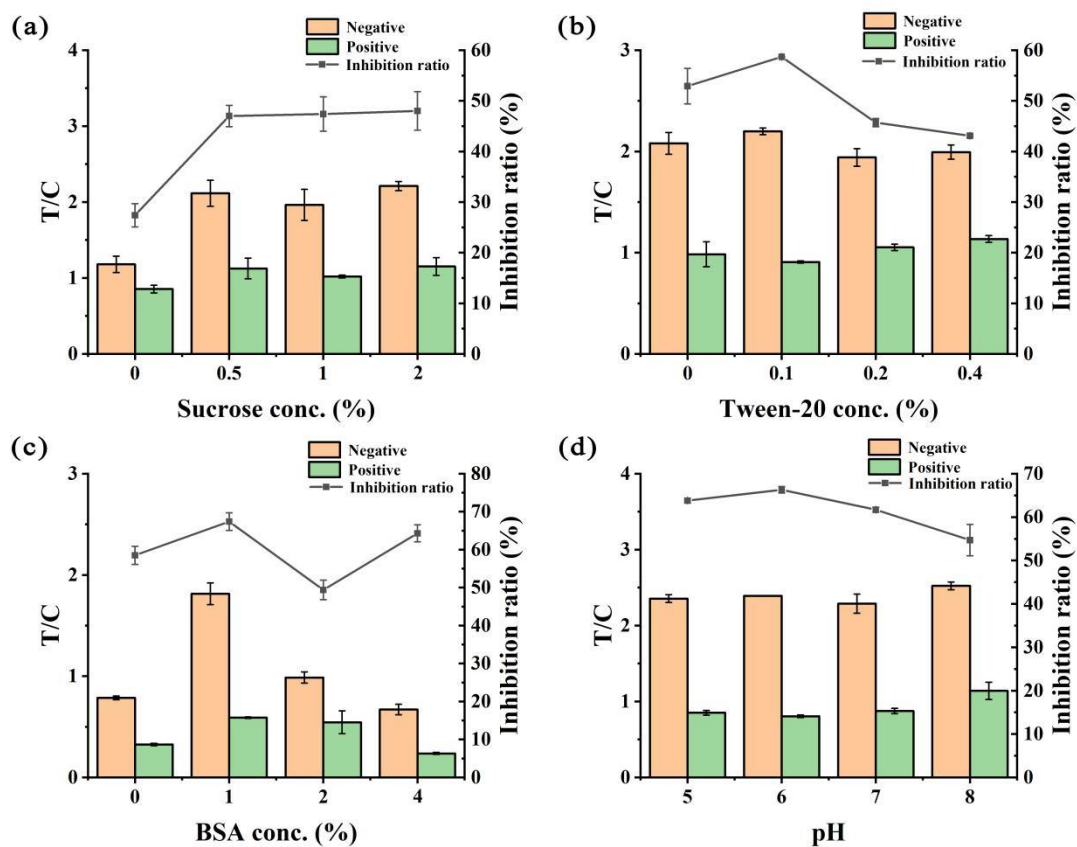

**Figure S9.** The signal intensity and inhibition results of sample pad pretreatment solution (a) Sucrose concentration; (b) Tween-20 concentration; (c) BSA concentration; (d) pH. The spiked target concentrations of the inhibitory effect were 1  $\mu\text{g/mL}$ .

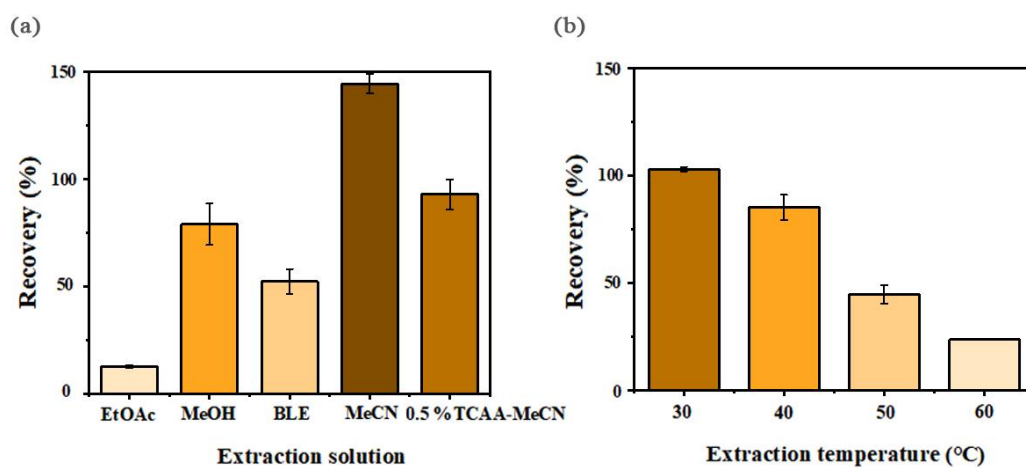

**Figure S10.** Optimization of sample pretreatment conditions (n=3). **(a)** Extraction solution. **(b)** Extraction temperature

**Table S1.** Characterization of the mouse antiserum against free CPSE.

| Immunogen (CPS-H <sub>2</sub> -LF) |                     |                         |                     |            |                     |                 |
|------------------------------------|---------------------|-------------------------|---------------------|------------|---------------------|-----------------|
| Coating antigen                    | Mouse 1             |                         | Mouse 2             |            | Mouse 3             |                 |
|                                    | Titer <sup>a</sup>  | Inhibition <sup>b</sup> | Titer               | Inhibition | Titer               | Inhibition      |
|                                    | (×10 <sup>3</sup> ) | (%)                     | (×10 <sup>3</sup> ) | (%)        | (×10 <sup>3</sup> ) | (%)             |
| CPS-H <sub>1</sub> -BSA            | 1                   | 43                      | 8                   | 64         | 8                   | 50              |
| CPS-H <sub>2</sub> -BSA            | 16                  | 2                       | 16                  | 5          | 16                  | ND <sup>c</sup> |

<sup>a</sup>Titer is defined as dilution factor of antiserum with the absorbance at 450 nm being situated at about 1.0-1.5 at coating concentration of 1 µg/mL.

<sup>b</sup>Percentage inhibition was expressed as follow: inhibition (%)=[1-(B/B<sub>0</sub>)]×100. B<sub>0</sub> was mean absorbance of the wells in the absence of competitor. B was mean absorbance of the wells in the presence of certain concentration of competitor.

<sup>c</sup>ND, no detected.

**Table S2.** Stability of fluorescent liquid (n=3).

| Time<br>(days) | 4 °C           |                |       | 37 °C |      |       |
|----------------|----------------|----------------|-------|-------|------|-------|
|                | T <sup>a</sup> | C <sup>b</sup> | T/C   | T     | C    | T/C   |
| 2              | 6716           | 2331           | 2.881 | 6790  | 2362 | 2.875 |
| 4              | 6762           | 2435           | 2.777 | 6894  | 2510 | 2.747 |
| 6              | 6708           | 2410           | 2.783 | 6709  | 2496 | 2.688 |
| 8              | 6874           | 2608           | 2.636 | 6745  | 2577 | 2.617 |
| 10             | 6766           | 2334           | 2.899 | 6716  | 2331 | 2.881 |

<sup>a</sup>T was mean the fluorescence signal intensity of T line.

<sup>b</sup>C was mean the fluorescence signal intensity of C line.

**Table S3.** Stability of FICA (n=3).

| Time<br>(days) | 37 °C          |                |       | 45 °C |      |       |
|----------------|----------------|----------------|-------|-------|------|-------|
|                | T <sup>a</sup> | C <sup>b</sup> | T/C   | T     | C    | T/C   |
| 1              | 6525           | 2414           | 2.703 | 6606  | 2409 | 2.742 |

---

|    |      |      |       |      |      |       |
|----|------|------|-------|------|------|-------|
| 7  | 6654 | 2247 | 2.961 | 6566 | 2261 | 2.904 |
| 15 | 6795 | 2476 | 2.744 | 6452 | 2286 | 2.822 |

---

<sup>a</sup>T was mean the fluorescence signal intensity of T line.

<sup>b</sup>C was mean the fluorescence signal intensity of C line.

**Table S4.** Test results of precision of intra-assay (n=3).

| Number | T <sup>a</sup> | C <sup>b</sup> | T/C   |
|--------|----------------|----------------|-------|
| 1      | 5938           | 1994           | 2.978 |
| 2      | 5891           | 1980           | 2.975 |
| 3      | 5894           | 2131           | 2.766 |
| 4      | 6034           | 2190           | 2.883 |
| 5      | 5968           | 2070           | 2.871 |
| CV     | 8.9%           | 3.9%           | 3.4%  |

---

<sup>a</sup>T was mean the fluorescence signal intensity of T line.

<sup>b</sup>C was mean the fluorescence signal intensity of C line.

**Table S5.** Test results of precision of inter-assay (n=3).

| Number | T <sup>a</sup> | C <sup>b</sup> | T/C   |
|--------|----------------|----------------|-------|
| 1      | 5924           | 1865           | 3.176 |

---

|    |      |      |       |
|----|------|------|-------|
| 2  | 5874 | 1869 | 3.142 |
| 3  | 6058 | 1981 | 3.058 |
| 4  | 5907 | 1914 | 3.086 |
| 5  | 5995 | 1887 | 3.177 |
| CV | 1.1% | 2.5% | 1.5%  |

---

<sup>a</sup>T was mean the fluorescence signal intensity of T line.

<sup>b</sup>C was mean the fluorescence signal intensity of C line.
